# Supplementary material
Source: publisher figshare collection journal article supplement (https://frontiersin.figshare.com/ndownloader/files/26444288)
Supplement: Supplementary file [file 26444288]

**Supplementary Table 1. Overview of a selection of theoretical studies addressing endocytosis.**

| <b>Study</b>                 | <b>Type of modeling</b>                                                                                             | <b>Brief model summary</b>                                                                                                                       | <b>Parameters (selection)</b>                                       | <b>Main conclusions (selection)</b>                                                                                                                                                                        |
|------------------------------|---------------------------------------------------------------------------------------------------------------------|--------------------------------------------------------------------------------------------------------------------------------------------------|---------------------------------------------------------------------|------------------------------------------------------------------------------------------------------------------------------------------------------------------------------------------------------------|
| (Deng, Dutta et al. 2019)    | Monte-Carlo simulations of ligand-receptor and clathrin-mediated endocytosis.                                       | Nanoparticle uniformly covered with ligands. The nanoparticle is able to translate and rotate. The receptors can freely diffuse in the membrane. | 80 nm spherical, oblate, prolate shapes.                            | Oblate particles: tip-first; near spherical slightly oblate or slightly prolate: tip-first and tilted; prolate particles: laying-down mode. Uptake of AR = 1 most efficient.                               |
| (Deng, Dutta et al. 2018)    | Stochastic particle binding model and Monte Carlo simulations of ligand-receptor and clathrin-mediated endocytosis. | Nanoparticle uniformly covered with ligands. The nanoparticle is able to translate and rotate. The receptors can freely diffuse in the membrane. | 40 to 160 nm spherical particles.                                   | 80 nm is optimal size for endocytosis.                                                                                                                                                                     |
| (Deng, Dutta et al. 2019)    | Stochastic particle binding model and Monte Carlo simulations of ligand-receptor and clathrin-mediated endocytosis  | Nanoparticle uniformly covered with ligands. The nanoparticle is able to translate and rotate. The receptors can freely diffuse in the membrane. | 80 nm spherical particles with range of ligand densities.           | Optimal ligand density and binding affinity endocytosis.                                                                                                                                                   |
| (Chen, Xiao et al. 2016)     | Coarse-grained molecular simulations.                                                                               | Membrane bilayer with 18,000 lipids. Membrane rapping dynamics.                                                                                  | Particles spherical, prolate, oblate with different AR and volumes. | Small ellipsoids endocytosed in laying-down mode.                                                                                                                                                          |
| (Bahrami, Raatz et al. 2014) | Review of Monte Carlo and coarse-grained molecular dynamics simulations.                                            | Elastic models of membranes to assess bending and adhesion energies during endocytosis                                                           | Reviewed different parameters for endocytosis.                      | Particle size affects adhesion energy. Membrane bending energy is minimal for AR=1. Oblate particles: laying down; prolate particles tip-first mode. Cooperative uptake of multiple particles in tube-like |

|                              |                                                                                        |                                                                                                                                        |                                                                                                                                                             |                                                                                                                                                                         |
|------------------------------|----------------------------------------------------------------------------------------|----------------------------------------------------------------------------------------------------------------------------------------|-------------------------------------------------------------------------------------------------------------------------------------------------------------|-------------------------------------------------------------------------------------------------------------------------------------------------------------------------|
|                              |                                                                                        |                                                                                                                                        |                                                                                                                                                             | membrane invaginations.                                                                                                                                                 |
| (Shen and Ye 2019)           | Coarse-grained molecular dynamics simulations.                                         | Membrane of 27,000 lipids. Each lipid molecule is represented by a single spherical bead and nanoparticles by several connected beads. | Elastic nanoparticles with different AR, elasticities, sizes (25 to 100 nm) and shapes (spherical and cubical, prolate and rod-like, oblate and disk-like). | Oblate shape is least sensitive to changes of particle elasticity during uptake. Oblate particles: tip-first; prolate particles: laying down.                           |
| (Richards and Endres 2016)   | Numerical calculations of receptor mediated phagocytosis. Includes actin cytoskeleton. | Calculations of binding and membrane bending energies. Receptors fixed or mobile.                                                      | $\mu\text{m}$ -sized spheres, ellipsoids, capped cylinders, and hourglass-shaped particles.                                                                 | Membrane wrapping of highly curved regions less efficient. Some ellipsoids engulfing is faster than spheres. Phagocytosis of particles with high or too low AR stalled. |
| (Agudo-Canalejo 2020)        | Calculations of free energies of endocytosis.                                          | Differently oriented ellipsoidal particles relative to membrane. Membrane wrapping and particle adhesion energy.                       | Shapes: spherical, prolate, oblate expressed.                                                                                                               | Spheres: optimal membrane engulfment, but membrane adhesion can be more efficient for ellipsoid particles.                                                              |
| (Bahrami 2013)               | Monte Carlo simulation                                                                 | Membrane is modelled as a triangulated vesicle with vertices.                                                                          | Uptake of nm-sized particles in $\sim 10$ -fold larger vesicles. Shapes: spherical, oblate, prolate.                                                        | Less efficient internalization for particles with high AR. Ellipsoidal particles reorient during uptake.                                                                |
| (Dasgupta, Auth et al. 2014) | Numerical calculations of endocytosis.                                                 | Triangulated membranes. Energy of membrane deformation, and particle adhesion.                                                         | Ellipsoid particles of 20-100 nm size with $1 < \text{AR} < 3$ . Blunt tips and increasing edge curvature.                                                  | Increased AR is unfavourable for complete wrapping. High AR and round tips: laying-down mode; small AR and                                                              |

|                                     |                                                                                                                      |                                                                                                                                                          |                                                    |                                                                                                                                |
|-------------------------------------|----------------------------------------------------------------------------------------------------------------------|----------------------------------------------------------------------------------------------------------------------------------------------------------|----------------------------------------------------|--------------------------------------------------------------------------------------------------------------------------------|
|                                     |                                                                                                                      |                                                                                                                                                          |                                                    | flat tips: tip-first mode.                                                                                                     |
| (Khosravanizadeh, Sens et al. 2019) | Coarse-grained molecular dynamics model. Planar substrate mimicking the cytoskeleton.                                | Energy of membrane deformations and adhesion to particle and cytoskeleton.                                                                               | Infinite long cylindrical nanoparticle (nanowire). | Initial membrane wrapping is independent of membrane tension, but complete wrapping is strongly dependent on membrane tension. |
| (Hashemi, Sens et al. 2014)         | Calculations of free energies of endocytosis. Includes cytoskeleton.                                                 | Engulfment of a cylindrical object by a bilayer adhered to a rigid plane (cytoskeleton).                                                                 | Cylindrical particles (100 nm - 1 $\mu$ m radius). | Less efficient engulfment if interactions with cytoskeleton too strong.                                                        |
| (Curk, Wirnsberger et al. 2018)     | Statistical mechanical modelling and coarse-grained molecular dynamics simulations of receptor-mediated endocytosis. | Calculations of binding and membrane bending energies and simulations of receptor with lipids (25 x 25 nm area). Intrinsic curvature of membrane system. | Differently sized spherical particles.             | Endocytosis more efficient with negatively curved inclusions; lower with positively curved inclusions.                         |

\*AR: aspect ratio

## References

- Agudo-Canalejo, J. (2020). "Engulfment of ellipsoidal nanoparticles by membranes: full description of orientational changes." *J Phys Condens Matter* **32**(29): 294001.
- Bahrami, A. H. (2013). "Orientational changes and impaired internalization of ellipsoidal nanoparticles by vesicle membranes." *Soft Matter* **9**(36): 8642-8646.
- Bahrami, A. H., M. Raatz, J. Agudo-Canalejo, R. Michel, E. M. Curtis, C. K. Hall, M. Gradzielski, R. Lipowsky and T. R. Weikl (2014). "Wrapping of nanoparticles by membranes." *Adv Colloid Interface Sci* **208**: 214-224.
- Chen, L., S. Xiao, H. Zhu, L. Wang and H. Liang (2016). "Shape-dependent internalization kinetics of nanoparticles by membranes." *Soft Matter* **12**(9): 2632-2641.
- Curk, T., P. Wirnsberger, J. Dobnikar, D. Frenkel and A. Šarić (2018). "Controlling Cargo Trafficking in Multicomponent Membranes." *Nano Letters* **18**(9): 5350-5356.
- Dasgupta, S., T. Auth and G. Gompper (2014). "Shape and Orientation Matter for the Cellular Uptake of Nonspherical Particles." *Nano Letters* **14**(2): 687-693.

Deng, H., P. Dutta and J. Liu (2018). "Stochastic simulations of nanoparticle internalization through transferrin receptor dependent clathrin-mediated endocytosis." Biochim Biophys Acta Gen Subj **1862**(9): 2104-2111.

Deng, H., P. Dutta and J. Liu (2019). "Entry modes of ellipsoidal nanoparticles on a membrane during clathrin-mediated endocytosis." Soft Matter **15**(25): 5128-5137.

Deng, H., P. Dutta and J. Liu (2019). "Stochastic modeling of nanoparticle internalization and expulsion through receptor-mediated transcytosis." **11**(23): 11227-11235.

Hashemi, S. M., P. Sens and F. Mohammad-Rafiee (2014). "Regulation of the membrane wrapping transition of a cylindrical target by cytoskeleton adhesion." Journal of The Royal Society Interface **11**(100): 20140769.

Khosravanizadeh, A., P. Sens and F. Mohammad-Rafiee (2019). "Wrapping of a nanowire by a supported lipid membrane." Soft Matter **15**(37): 7490-7500.

Richards, D. M. and R. G. Endres (2016). "Target shape dependence in a simple model of receptor-mediated endocytosis and phagocytosis." Proc Natl Acad Sci U S A **113**(22): 6113-6118.

Shen, Z. and H. Ye (2019). "Membrane Wrapping Efficiency of Elastic Nanoparticles during Endocytosis: Size and Shape Matter." ACS Nano **13**(1): 215-228.
